# Supplementary material for: Whole Transcription Profile of Responders to Anti-TNF Drugs in Pediatric Inflammatory Bowel Disease
Source: Pharmaceutics. 2021 Jan 8;13(1):77. doi: 10.3390/pharmaceutics13010077 (PMC7830359; doi:10.3390/pharmaceutics13010077)
Supplement: Supplementary file 1 [file pharmaceutics-13-00077-s001.pdf]

Supplement

# Whole Transcription Profile of Responders to Anti-TNF Drugs in Pediatric Inflammatory Bowel Disease

Sara Salvador-Martín <sup>1,†</sup>, Bartosz Kaczmarczyk <sup>1,†</sup>, Rebeca Álvarez <sup>2</sup>, Víctor Manuel Navas-López <sup>3</sup>, Carmen Gallego-Fernández <sup>4</sup>, Ana Moreno-Álvarez <sup>5</sup>, Alfonso Solar-Boga <sup>5</sup>, Cesar Sánchez <sup>6</sup>, Mar Tolín <sup>6</sup>, Marta Velasco <sup>7</sup>, Rosana Muñoz-Codoceo <sup>7</sup>, Alejandro Rodriguez-Martinez <sup>8</sup>, Concepción A. Vayo <sup>9</sup>, Ferrán Bossacoma <sup>10</sup>, Gemma Pujol-Muncunill <sup>11</sup>, María J. Fobelo <sup>12</sup>, Antonio Millán-Jiménez <sup>13</sup>, Lorena Magallares <sup>14</sup>, Eva Martínez-Ojinaga <sup>14</sup>, Inés Loverdos <sup>15</sup>, Francisco J. Eizaguirre <sup>16</sup>, José A. Blanca-García <sup>17</sup>, Susana Clemente <sup>18</sup>, Ruth García-Romero <sup>19</sup>, Vicente Merino-Bohórquez <sup>20</sup>, Rafael González de Caldas <sup>21</sup>, Enrique Vázquez <sup>2</sup>, Ana Dopazo <sup>2</sup>, María Sanjurjo-Sáez <sup>1</sup> and Luis A. López-Fernández <sup>1,\*</sup>

Table S1. Characteristics of patients selected for RNAseq. .

| Characteristic                                   | Overall<br>( <i>n</i> = 12) | Responders<br>( <i>n</i> = 6) | Non-Responders<br>( <i>n</i> = 6) | <i>p</i> Value |
|--------------------------------------------------|-----------------------------|-------------------------------|-----------------------------------|----------------|
| <b>Gender</b>                                    |                             |                               |                                   |                |
| Male, <i>n</i> (%)                               | 8 (66.7%)                   | 4 (66.7%)                     | 4 (66.7%)                         | 1              |
| Female, <i>n</i> (%)                             | 4 (33.3%)                   | 2 (33.3%)                     | 2 (33.3%)                         |                |
| <b>Age (years)</b>                               |                             |                               |                                   |                |
| At diagnosis, median (IQR, range)                | 10 (3.53, 0.7-13)           | 9.85 (2.38, 7.9-12)           | 10.2 (7.2, 0.7-13)                | 0.630          |
| At start of treatment, median (IQR, range)       | 10.2 (3.1, 1.1-14.1)        | 9.9 (1.83, 7.9-12.8)          | 11.4 (6.25, 1.1-14.1)             | 0.956          |
| <b>Type of IBD</b>                               |                             |                               |                                   |                |
| CD, <i>n</i> (%)                                 | 9 (75%)                     | 4 (66.7%)                     | 5 (83.3%)                         | 1              |
| UC, <i>n</i> (%)                                 | 3 (25%)                     | 2 (33.3%)                     | 1 (16.7%)                         |                |
| <b>Type of Anti-TNF</b>                          |                             |                               |                                   |                |
| Infliximab, <i>n</i> (%)                         | 8 (66.7%)                   | 4 (66.7%)                     | 4 (66.7%)                         | 1              |
| Adalimumab, <i>n</i> (%)                         | 4 (33.3%)                   | 2 (33.3%)                     | 2 (33.3%)                         |                |
| PCDAI at start of treatment, median (IQR, range) | 27.5 (20, 7.5-52.5)         | 35 (21.25, 27.5-52.5)         | 15 (12.5, 7.5-30)                 | 0.025**        |
| PUCAI at start of treatment, median (IQR, range) | 45 (40-60)*                 | 50 (40-60)*                   | 45*                               | -              |

|                                                   |                         |                            |                          |       |
|---------------------------------------------------|-------------------------|----------------------------|--------------------------|-------|
| CRP at start of treatment, median (IQR, range)    | 22.3 (25.1, 0.7-52.3)   | 28.8 (30.38, 0.7-52.3)     | 10.58 (19.15, 6.12-27.5) | 0.121 |
| FC at start of treatment, median (IQR, range)     | 1800 (2392, 225.1-3956) | 2700 (1934.73, 225.1-3956) | 1319 (1352, 288-1800)    | 0.075 |
| Concomitant immunomodulator at start of treatment |                         |                            |                          |       |
| Azathioprine, <i>n</i> (%)                        | 7 (58.3%)               | 4 (66.7%)                  | 3 (50%)                  |       |
| Methotrexate, <i>n</i> (%)                        | 2 (16.7%)               | 2 (33.3%)                  | 0                        | 0.076 |
| None, <i>n</i> (%)                                | 3 (25%)                 | 0                          | 3 (50%)                  |       |

IBD, inflammatory bowel disease; CD, Crohn's disease; UC, ulcerative colitis; IQR, interquartile range; PCDAI, Pediatric Crohn's Disease Activity Index; PUCAL, Pediatric Ulcerative Colitis Activity Index; CRP, C-reactive protein; FC, fecal calprotectin. \* IQR not applicable. \*\* *p* value < 0.05.

**Table S2.** Top diseases and biofunctions of differentially expressed between responders and non-responders prior anti-TNF treatment initiation.

| Category                                      | Process                                       | <i>p</i> value range                         |
|-----------------------------------------------|-----------------------------------------------|----------------------------------------------|
| Diseases and disorders                        | Developmental disorder                        | $1.96 \times 10^{-2} - 9.23 \times 10^{-15}$ |
|                                               | Hereditary disorder                           | $1.48 \times 10^{-2} - 9.23 \times 10^{-15}$ |
|                                               | Metabolic disease                             | $1.25 \times 10^{-2} - 9.23 \times 10^{-15}$ |
|                                               | Neurological disease                          | $1.96 \times 10^{-2} - 9.23 \times 10^{-15}$ |
|                                               | Ophthalmic disease                            | $5.27 \times 10^{-2} - 9.23 \times 10^{-15}$ |
| Molecular and Cellular Function               | Cell-to-cell signaling interaction            | $1.96 \times 10^{-2} - 4.30 \times 10^{-6}$  |
|                                               | Cellular movement                             | $1.96 \times 10^{-2} - 4.22 \times 10^{-6}$  |
|                                               | Cell signaling                                | $1.93 \times 10^{-2} - 1.22 \times 10^{-6}$  |
|                                               | Cellular assembly and organization            | $1.70 \times 10^{-2} - 5.04 \times 10^{-6}$  |
|                                               | Cellular growth and proliferation             | $1.96 \times 10^{-2} - 5.41 \times 10^{-6}$  |
| Physiological System development and function | Hematological system development and function | $1.96 \times 10^{-2} - 4.30 \times 10^{-9}$  |
|                                               | Immune cell trafficking                       | $1.96 \times 10^{-2} - 4.30 \times 10^{-9}$  |
|                                               | Lymphoid tissue structure and development     | $1.93 \times 10^{-2} - 1.10 \times 10^{-5}$  |
|                                               | Cell-mediated immune response                 | $1.83 \times 10^{-2} - 2.52 \times 10^{-5}$  |
|                                               | Organismal functions                          | $6.58 \times 10^{-2} - 7.43 \times 10^{-5}$  |

**Table S3.** Top diseases and biofunctions of differentially expressed between responders and non-responders after two weeks of anti-TNF treatment initiation.

| Category                                      | Process                                    | <i>p</i> value range                         |
|-----------------------------------------------|--------------------------------------------|----------------------------------------------|
| Diseases and disorders                        | Inflammatory response                      | $1.30 \times 10^{-2} - 5.74 \times 10^{-23}$ |
|                                               | Organismal injury and abnormalities        | $1.30 \times 10^{-2} - 5.21 \times 10^{-6}$  |
|                                               | Dermatological diseases and conditions     | $8.55 \times 10^{-3} - 5.86 \times 10^{-6}$  |
|                                               | Connective tissue disorders                | $1.30 \times 10^{-2} - 1.40 \times 10^{-5}$  |
|                                               | Inflammatory disease                       | $1.30 \times 10^{-2} - 1.40 \times 10^{-5}$  |
| Molecular and Cellular Function               | Cellular function and maintenance          | $1.19 \times 10^{-2} - 5.11 \times 10^{-19}$ |
|                                               | Cellular movement                          | $1.19 \times 10^{-2} - 1.13 \times 10^{-7}$  |
|                                               | Cellular assembly and organization         | $1.02 \times 10^{-2} - 5.99 \times 10^{-5}$  |
|                                               | Cell-to-death signaling and interaction    | $1.30 \times 10^{-2} - 7.98 \times 10^{-5}$  |
|                                               | Cell death and survival                    | $1.19 \times 10^{-2} - 1.02 \times 10^{-4}$  |
| Physiological System development and function | Humoral immune response                    | $1.23 \times 10^{-2} - 5.74 \times 10^{-23}$ |
|                                               | Immune cell trafficking                    | $1.20 \times 10^{-2} - 1.13 \times 10^{-7}$  |
|                                               | Connective tissue development and function | $1.02 \times 10^{-2} - 7.98 \times 10^{-5}$  |
|                                               | Tissue morphology                          | $1.02 \times 10^{-2} - 3.01 \times 10^{-4}$  |
|                                               | Endocrine system development and function  | $1.19 \times 10^{-2} - 4.31 \times 10^{-4}$  |
